# Supplementary material
Source: PubMed Central journal article supplement (PMC2002612)
Supplement: plntcell_tpc.107.053579_1.pdf [file plntcell_tpc.107.053579_1.pdf]

## Supplemental data

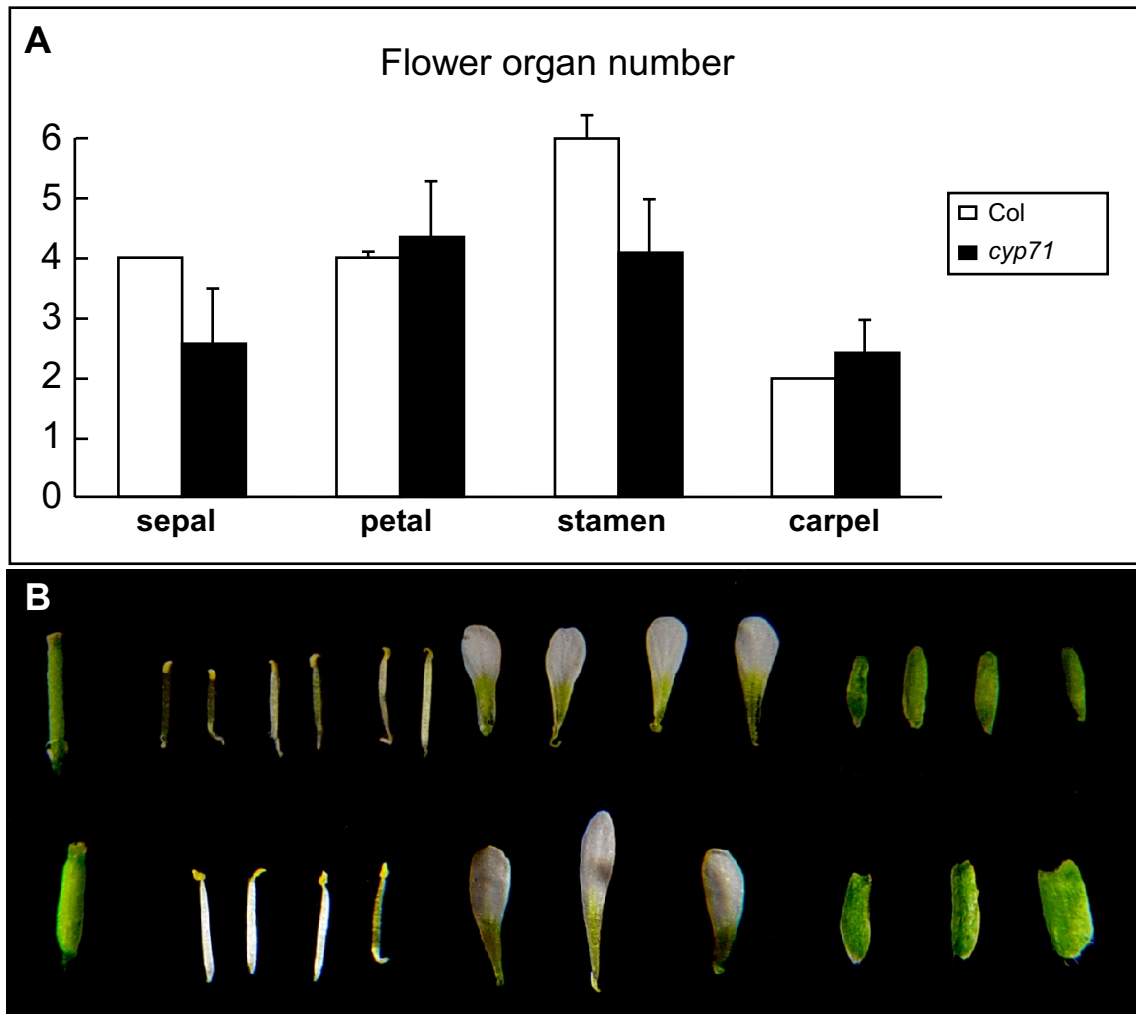

Figure S1 Disruption of CYP71 Alters the Number and Morphology of Flower Organs.

(A) The number of sepals, petals, stamens, and carpels in the wild-type and *cyp71* mutant flowers. A total of 100 flowers from the wild-type or *cyp71* mutant plants were scored for the analysis. The numbers were presented as average and the error bars represent standard deviations.

(B) Dissected floral organs from wild-type (upper) and a typical mutant flower (lower).
