# Supplementary material
Source: PubMed Central journal article supplement (PMC2002612)
Supplement: plntcell_tpc.107.053579_2.pdf [file plntcell_tpc.107.053579_2.pdf]

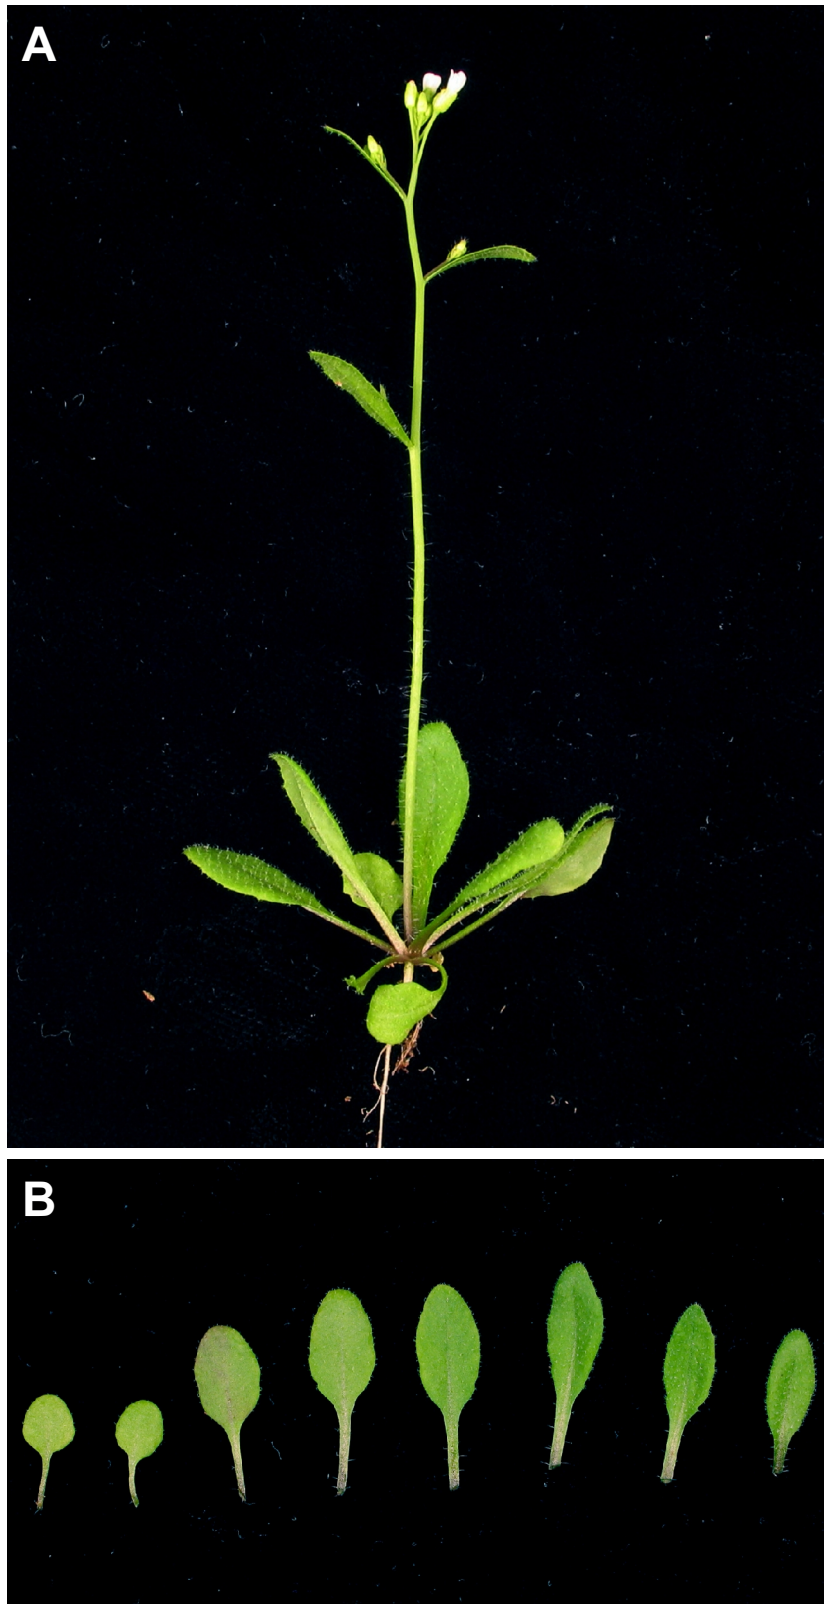

Figure S2 Complementation of *cyp71* mutant by *35S-CYP71-GFP*.

(A) The adult rescued plants grown in greenhouse for 4 weeks.

(B) The leaves of rescued plants in (A).
